# Supplementary material for: Anti-Inflammatory Effects of Geniposidic Acid on Porphyromonas gingivalis-Induced Periodontitis in Mice
Source: MDPI journal article supplement (doi:10.3390/biomedicines10123096), 2022-12-01
Supplement: s1 [file s1]

**Table S1. Primer sets used for real-time PCR analysis**

| Gene (protein)                     | Primer sequence (5'–3')   |
|------------------------------------|---------------------------|
| <i>Il-6</i> F (IL-6)               | GGAGACTTGCCTGGTGAAAA      |
| <i>Il-6</i> R                      | GTCAGGGGTGGTTATTGCAT      |
| <i>Tlr2</i> F (TLR2)               | GCCAAAGTCTTGATTGATTGG     |
| <i>Tlr2</i> R                      | TTGAAGTTCTCCAGCTCCTG      |
| <i>Oscar</i> F (OSCAR)             | TGGCGGTTTGCACTCTTCA       |
| <i>Oscar</i> R                     | GATCCGTTACCAGCAGTTCCAGA   |
| <i>c-fos</i> F (c-Fos)             | AAGATGGCTGCAGCCAAGTG      |
| <i>c-foc</i> R                     | TCCAGTTTTTCCTTCTCTTTCAGCA |
| <i>Nfatc1</i> F (NFATc1)           | TCATCCTGTCCAACACCAAA      |
| <i>Nfatc1</i> R                    | TTGCGGAAAGGTGGTATCTC      |
| <i>Mmp-9</i> F (MMP-9)             | CTGGACAGCCAGACACTAAAG     |
| <i>Mmp-9</i> R                     | CTCGCGGCAAGTCTTCAGAG      |
| <i>CatK</i> F (CatK)               | GAAGAAGACTCACCAGAAGCAG    |
| <i>CatK</i> R                      | TCCAGGTTATGGGCAGAGATT     |
| <i>Dc-stamp</i> F (DC-STAMP)       | CTTGCAACCTAAGGGCAAAG      |
| <i>Dc-stamp</i> R                  | TCAACAGCTCTGTCGTGACC      |
| $\beta$ -actin F ( $\beta$ -actin) | GACGGGGTCACCCACACTGT      |
| $\beta$ -actin R                   | AGGAGCAATGATCTTGATCTTC    |
